# Supplementary material for: Newly Synthesized Imino-Derivatives Analogues of Resveratrol Exert Inhibitory Effects in Breast Tumor Cells
Source: MDPI journal article supplement (doi:10.3390/ijms21207797), 2020-10-21
Supplement: s1 [file s1]

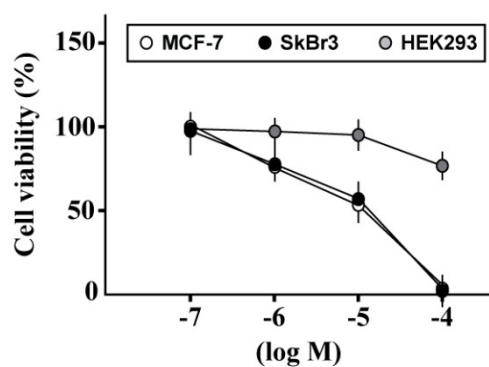

**Supplementary Figure 1.** Evaluation of the antiproliferative response to compound **3** in MCF-7 and SkBr3 breast cancer cells and in HEK293 cells upon a 48 h treatment, as determined by using the MTT assay. Cell viability was expressed as the percentage of cells treated with the different concentrations of compound **3** respect to cells treated with vehicle. Data shown are the mean  $\pm$  SD of three independent experiments performed in triplicate.
